# Supplementary material for: Effects of variation in forest fragment habitat on black howler monkey demography in the unprotected landscape around Palenque National Park, Mexico
Source: PeerJ. 2020 Aug 10;8:e9694. doi: 10.7717/peerj.9694 (PMC7425640; doi:10.7717/peerj.9694)
Supplement: Supplemental Information 3 — p-Values denoted as follows: 0.1 > p > 0.05; *p < 0.05; **p <0.01; ***p < 0.001; ****p < 0.0001. [file peerj-08-9694-s003.xlsx]

## Sheet: Sheet1
	fragment area	shape index	stem density	min. tree DBH	max. tree DBH	min. tree height	max. tree height	Shannon's diversity index	Simpson's evenness index	no. stumps	mean stump DBH	isolation distance to nearest fragment	isolation distance to PNP	number of treelines extending from fragment	proportion forest cover in buffer around fragment	total no. of individuals per fragment	fragment population density	proportion of AM in the fragment population	proportion of AF in the fragment population	mean fragment group size	mean # AM/group in the fragment	mean # AF/group in the fragment
fragment area		0.296868	0.199743	-0.160473	-0.222874	-0.0711207	0.0779531	0.0537073	-0.232038	0.174044	-0.335468	-0.283029	0.00962567	* 0.388	0.202526	**** 0.734	** -0.491	-0.024943	0.212308	0.217143	0.159911	0.321138
shape index			-0.12282	-0.322661	0.17522	-0.0605911	0.103081	0.148291	0.200513	0.0700602	-0.0906404	0.0217009	-0.268144	0.296272	0.184003	0.113616	-0.233802	0.225565	-0.00261161	-0.188149	0.00806416	-0.123973
stem density				* -0.364	-0.218469	* -0.387	-0.0366526	* 0.397	-0.325684	* 0.371	0.188819	-0.0759274	0.143198	0.0098565	-0.0898639	0.248802	0.157088	** 0.513	-0.0360281	-0.0761697	* 0.384	-0.215298
min. tree DBH					0.0901468	0.342012	* -0.376	** -0.450	-0.121212	* -0.385	-0.297239	0.156499	0.236897	-0.307835	-0.213983	-0.188821	-0.00266868	-0.198212	-0.0233039	0.0652039	-0.122655	0.0700403
max. tree DBH						-0.192118	0.329237	0.13216	0.254399	0.00129058	-0.0300493	0.275527	-0.118035	0.0499438	0.13315	-0.216466	0.0894592	0.233954	0.099421	-0.0904006	0.175921	-0.0186008
min. tree height							-0.108053	*** -0.601	-0.107697	-0.319335	-0.335585	-0.180421	-0.0193966	-0.0581033	-0.0819079	-0.214266	-0.274835	-0.324083	0.00195204	-0.166449	* -0.394	-0.144109
max. tree height								0.271302	0.227806	0.175187	0.157051	-0.00761328	-0.279347	0.0559261	** 0.497	0.0325952	-0.0923684	-0.114104	0.0524235	0.0217825	-0.0973549	0.131335
Shannon's diversity index									** 0.461	**** 0.702	0.122922	-0.126868	-0.143342	0.0881988	** 0.453	0.327127	0.325603	0.16735	-0.11096	-0.0843878	0.195396	-0.145437
Simpson's evenness index										0.229539	0.0842365	0.0907424	-0.195381	0.181209	* 0.420	0.00018454	0.209716	-0.0766911	0.0173387	-0.00129673	-0.0723546	0.028183
no. stumps											0.0821363	-0.127607	-0.284297	0.213471	0.271755	0.0865974	-0.0592855	0.0525143	-0.0552927	-0.270105	-0.0124363	-0.294932
mean stump DBH												0.065279	0.119212	-0.0262164	0.0316129	-0.212795	0.197339	0.0309795	0.205798	0.0259339	-0.102233	-0.048557
isolation distance to nearest fragment													0.0580729	0.0714128	** -0.448	* -0.356	0.00924723	0.260114	-0.0285806	-0.0208246	0.256396	0.0148927
isolation distance to PNP														-0.0517276	** -0.474	0.161737	0.204309	-0.101158	0.0267306	0.235341	0.0401492	0.172872
number of treelines extending from fragment															-0.0509732	0.141581	* -0.366	0.0445579	-0.13898	0.214634	0.190528	-0.0159662
proportion forest cover in buffer around fragment																0.336648	-0.0213581	-0.14416	-0.0384026	0.0333755	-0.144917	-0.0175873
total no. of individuals per fragment																	0.143771	-0.0368735	0.115165	** 0.493	0.331142	* 0.422
fragment population density																		0.138439	-0.000460942	* 0.356	0.317983	0.171253
proportion of AM in the fragment population																			0.0419538	-0.146321	**** 0.67	-0.22317
proportion of AF in the fragment population																				-0.0386109	-0.0320018	*** 0.551
mean fragment group size																					** 0.499	**** 0.686
mean # AM/group in the fragment																						0.267173
mean # AF/group in the fragment
